# Supplementary material for: Assessing gene-environment interaction effects of FTO, MC4R and lifestyle factors on obesity using an extreme phenotype sampling design: Results from the HUNT study
Source: PubMed Central journal article supplement (PMC5383228; doi:10.1371/journal.pone.0175071), 2017-04-06
Supplement: pone.0175071.s004.pdf [file pone.0175071.s004.pdf]

**S1 Table. Over-all genetic effects.**

| Trait       | SNP   | Age group   | Gender          | $\beta_{SNP}$ | 95% CI           | Adjusted p-value |
|-------------|-------|-------------|-----------------|---------------|------------------|------------------|
| WHR         | FTO   | 20-40 years | Men             | 0.0045        | 0.0013, 0.0077   | 0.048            |
|             |       |             | Women           | 0.0048        | 0.0016, 0.008    | 0.029            |
|             |       | 40-60 years | Men             | 0.0036        | 0.0015, 0.0057   | 0.014            |
|             |       |             | Women           | 0.0033        | 0.0011, 0.0055   | 0.024            |
|             |       | 60-80 years | Men             | 0.0022        | -0.00066, 0.0051 | 0.36             |
|             |       |             | Women           | 0.0019        | -0.0014, 0.0051  | 0.50             |
|             | MC4R  | 20-40 years | Men             | 0.0028        | -0.00095, 0.0065 | 0.40             |
|             |       |             | Women           | 0.0058        | 0.0023, 0.0092   | 0.017            |
|             |       | 40-60 years | Men             | 0.0024        | 4e-05, 0.0047    | 0.15             |
|             |       |             | Women           | 0.0033        | 0.00077, 0.0057  | 0.048            |
| 60-80 years | Men   | 0.0004      | -0.0028, 0.0036 | 1             |                  |                  |
|             | Women | 0.0062      | 0.0025, 0.0099  | 0.015         |                  |                  |
| BMI         | FTO   | 20-40 years | Men             | 0.37          | 0.15, 0.59       | 0.015            |
|             |       |             | Women           | 0.53          | 0.3, 0.76        | 0.00023          |
|             |       | 40-60 years | Men             | 0.32          | 0.17, 0.47       | 0.00071          |
|             |       |             | Women           | 0.49          | 0.33, 0.66       | 6.7e-07          |
|             |       | 60-80 years | Men             | 0.24          | 0.05, 0.43       | 0.072            |
|             |       |             | Women           | 0.25          | 0.02, 0.48       | 0.12             |
|             | MC4R  | 20-40 years | Men             | 0.24          | -0.015, 0.49     | 0.20             |
|             |       |             | Women           | 0.63          | 0.38, 0.88       | 5.2e-05          |
|             |       | 40-60 years | Men             | 0.33          | 0.17, 0.5        | 0.0019           |
|             |       |             | Women           | 0.24          | 0.044, 0.43      | 0.048            |
|             |       | 60-80 years | Men             | -0.0028       | -0.21, 0.21      | 1                |
|             |       |             | Women           | 0.45          | 0.19, 0.71       | 0.014            |

Estimated over-all effects ( $\beta_{SNP}$ ) with 95% confidence intervals for men and women in age groups 20-40 years, 40-60 years and 60-80 years. FDR-adjusted p-values for testing  $H_0: \beta_{SNP} = 0$  against  $H_1: \beta_{SNP} \neq 0$
