# Supplementary material for: Assessing gene-environment interaction effects of FTO, MC4R and lifestyle factors on obesity using an extreme phenotype sampling design: Results from the HUNT study
Source: PubMed Central journal article supplement (PMC5383228; doi:10.1371/journal.pone.0175071), 2017-04-06
Supplement: pone.0175071.s005.pdf [file pone.0175071.s005.pdf]

**S2 Table. Longitudinal genetic effects.**

| Trait       | SNP  | Age group   | Gender      | $\beta_{SNP}$    | 95% CI           | Adjusted p-value |       |
|-------------|------|-------------|-------------|------------------|------------------|------------------|-------|
| WHR         | FTO  | 30-40 years | Men         | 0.0023           | -0.0029, 0.0075  | 0.71             |       |
|             |      |             | Women       | 0.0046           | -0.0014, 0.011   | 0.36             |       |
|             |      | 40-60 years | Men         | 0.0015           | -0.00095, 0.0039 | 0.5              |       |
|             |      |             | Women       | 0.0026           | 3.8e-05, 0.0051  | 0.15             |       |
|             |      | 60-80 years | Men         | -0.00073         | -0.0037, 0.0023  | 0.86             |       |
|             |      |             | Women       | -0.00033         | -0.0036, 0.0029  | 1                |       |
|             | MC4R | 30-40 years | Men         | 0.00076          | -0.0055, 0.0071  | 1                |       |
|             |      |             | Women       | 0.0074           | 0.00092, 0.014   | 0.11             |       |
|             |      | 40-60 years | Men         | 0.00017          | -0.0025, 0.0028  | 1                |       |
|             |      |             | Women       | 0.00063          | -0.0023, 0.0035  | 0.86             |       |
| 60-80 years |      | Men         | 0.00032     | -0.003, 0.0036   | 1                |                  |       |
|             |      | Women       | 0.0033      | -0.00032, 0.0069 | 0.21             |                  |       |
| BMI         | FTO  | 30-40 years | Men         | -0.091           | -0.33, 0.15      | 0.74             |       |
|             |      |             | Women       | 0.091            | -0.18, 0.36      | 0.78             |       |
|             |      | 40-60 years | Men         | 0.14             | 0.045, 0.23      | 0.029            |       |
|             |      |             | Women       | 0.11             | -0.0065, 0.22    | 0.2              |       |
|             |      | 60-80 years | Men         | 0.0095           | -0.1, 0.12       | 1                |       |
|             |      |             | Women       | -0.0023          | -0.13, 0.13      | 1                |       |
|             |      | MC4R        | 30-40 years | Men              | 0.096            | -0.2, 0.39       | 0.78  |
|             |      |             |             | Women            | 0.32             | 0.032, 0.62      | 0.11  |
|             |      |             | 40-60 years | Men              | 0.041            | -0.062, 0.14     | 0.73  |
|             |      |             |             | Women            | -0.047           | -0.18, 0.083     | 0.78  |
|             |      |             | 60-80 years | Men              | -0.17            | -0.3, -0.043     | 0.048 |
|             |      |             |             | Women            | 0.086            | -0.06, 0.23      | 0.5   |

Estimated longitudinal effects ( $\beta_{SNP}$ ) with 95% confidence intervals for men and women in age groups 30-40 years (individuals younger than 30 years in HUNT3 did not participate in HUNT2), 40-60 years and 60-80 years. FDR-adjusted p-values for testing  $H_0: \beta_{SNP} = 0$  against  $H_1: \beta_{SNP} \neq 0$ .
